# Supplementary material
Source: Research Square preprint supplement (doi:10.21203/rs.3.rs-9893367/v1)
Supplement: Supplementary file 1 [file 0f4868f83cf0ff2b51c557fc.xlsx]

## Sheet: Sheet1
Supplemental Table 3. Gene expression increased by ITCZ stimulation
		Lead count			TPM (Transcripts Per Million) normalization
Gene ID*	Length (bp)	19007-Cont	19007-ITZ added	19006T-ITZ added	19007-Cont	19007-ITZ added	19006T-ITZ added	GenBank acccession number of highly homologous genes+	Gene names in the right column
TCONS_00001623	11590	1519	55862	46872	24.3572	809.71	752.125	XM_047748408.1	Trichophyton rubrum CBS 118892 uncharacterized protein
TCONS_00003307	6438	1236	28899	18387	35.6796	754.099	531.153	XM_003231211.2	Trichophyton rubrum CBS 118892 uncharacterized protein
TCONS_00003306	5959	1231	28647	18217	38.3917	807.611	568.543	XM_003231211.2	Trichophyton rubrum CBS 118892 uncharacterized protein
TCONS_00003635	1076	1308	27747	24249	225.916	4332.12	4191.23	XM_003014968.1	Trichophyton benhamiae CBS 112371 uncharacterized protein
TCONS_00005074	2657	1037	24361	19077	72.5337	1540.28	1335.3	XM_003014968.1	Trichophyton benhamiae CBS 112371 uncharacterized protein
TCONS_00000485	5330	2021	22947	13222	70.4679	723.261	461.349	XM_047748390.1	Trichophyton rubrum CBS 118892 uncharacterized protein
TCONS_00006002	5457	231	19959	15156	7.86702	614.443	516.524	XM_047748647.1	Trichophyton rubrum CBS 118892 leucine-tRNA ligase
TCONS_00002467	2602	216	6716	1668	15.4276	433.611	119.22	XM_003232040.2	Trichophyton rubrum CBS 118892 uncharacterized protein
TCONS_00000976	5562	377	5269	1694	12.5969	159.145	56.6425	XM_003017001.1	Trichophyton benhamiae CBS 112371 CP2 transcription factor
TCONS_00000977	5479	377	5269	1694	12.7877	161.556	57.5005	XM_003017001.1	Trichophyton benhamiae CBS 112371 CP2 transcription factor
TCONS_00006034	2543	279	4129	3940	20.3897	272.769	288.144	XM_003019340.1	Trichophyton verrucosum HKI 0517 uncharacterized protein
TCONS_00006348	1773	15	3076	6014	1.5723	291.457	630.833	XM_003236070.2	Trichophyton rubrum CBS 118892 uncharacterized protein
TCONS_00006349	1636	15	3076	6014	1.70396	315.864	683.66	XM_003236070.2	Trichophyton rubrum CBS 118892 uncharacterized protein
TCONS_00002426	2006	115	2119	1660	10.6542	177.458	153.899	XM_047748997.1	Trichophyton rubrum CBS 118892 uncharacterized protein
TCONS_00002427	1538	97	1769	1423	11.7211	193.227	172.071	XM_047748997.1	Trichophyton rubrum CBS 118892 uncharacterized protein
TCONS_00006776	3320	87	1658	467	4.87005	83.8963	26.1601	XM_047748678.1	Trichophyton rubrum CBS 118892 uncharacterized protein
TCONS_00000674	932	6	1127	1250	1.19643	203.144	249.433	XM_003237239.1	Trichophyton rubrum CBS 118892 uncharacterized protein
*The nucleotide sequence can be confirmed in Figure 1 of the supplementary file. +The genes showing the highest sequence similarity in the BLAST search are listed.
