# Supplementary material
Source: Research Square preprint supplement (doi:10.21203/rs.3.rs-9893367/v1)
Supplement: Supplementary file 1 [file f500532d56220ddab58d6cb9.docx]

**Table 1**. Susceptibility of *T. indotineae* to antifungal drugs

MICs (mg/L)

Strain number TBF ITCZ RVCZ VRCZ

NUBS19006T >32 2 4 1

NUBS19007 >32 0.03 0.03

∆TCONS_00001623-3 >32 0.125 0.5 0.5

∆TCONS_00001623-4 >32 0.25 1 1

MICs: minimum inhibitory concentrations

TBF: terbinafine, ITCZ: itraconazole, RVCZ: ravuconazole and VRCZ: voriconazole
