# Supplementary material
Source: Research Square preprint supplement (doi:10.21203/rs.3.rs-9893367/v1)
Supplement: Supplementary file 2 [file 2d2ab72c081ec26fcbc015aa.xlsx]

## Sheet: Table S_Primers
	Supplemental Table 2. Oligonucleotide primers used in this study
	Primer name	Sequence (5'-3')a	Chain	Purpose	References
	P1	GTTTACCTGCGTTCATAGACGGCGG	Sense	Amplication of TCONS_00001623 gene for RT-qPCR	This study
	P2	TCGTGAGGAGAAGGATGGTATCTCG	Anti-sense	Amplication of TCONS_00001623 gene for RT-qPCR	This study
	P3	TGTTGGTGAGGCACAGT	Sense	Amplication of Actin gene for RT-qPCR	This study
	P4	CCATGTCATCCCAGTTTGTG	Anti-sense	Amplication of Actin gene for RT-qPCR	This study
	P5	CACGAAGCTAactagtAGAGATGCAAGGGAGCAGC	Sense	Amplification of 5'-UTR of TCONS_00001623 gene	This study
	P6	CAATATCATCTTCTgggcccGGTTGCCGCCGTCTA	Anti-sense	Amplification of 5'-UTR of TCONS_00001623 gene	This study
	P7	TGAATCATCTggatccACGCTATTCACCCTTGATG	Sense	Amplification of 3'-UTR of TCONS_00001623 gene	This study
	P8	ACGGCCAGTGAATTggtaccAGGACAGTGAAACAG	Anti-sense	Amplification of 3'-UTR of TCONS_00001623 gene	This study
	P9	AGAGATGCAAGGGAGCAGCCATATCAAATAGAATA	Sense	Amplification of the repair fragment	This study
	P10	AGGACAGTGAAACAGCGATTATAAATCAAGCTGCG	Anti-sense	Amplification of the repair fragment	This study
	P11	AATTTGCACTGACGGACCCGTCTTCTGTGGCGCT	Sense	Screening of the desired transformants (amplification of a partial fragment of the TCONS_00001623 locus)	This study
	P12	AGTCACCGTGAGTGTCGTTATCGTGAGGTAGGGC	Anti-sense	Screening of the desired transformants (amplification of a partial fragment of the TCONS_00001623 locus)	This study
	P13	ACTGTATAGCCTATAAGCAATTGGTGCGAGATTGG	Sense	Screening of the desired transformants (amplification of a partial fragment of the TCONS_00001623 locus)	This study
	P14	TTGGTTTCATTATCCGTACATGTCTATGTATCGGG	Anti-sense	Screening of the desired transformants (amplification of a partial fragment of the TCONS_00001623 locus)	This study
	P15	CTCGACGTTGTCACTGAAGC	Sense	Screening of the desired transformants (amplification of the partial nptII fragment)	[17]
	P16	TCAGAAGAACTCGTCAAGAAG	Anti-sense	Screening of the desired transformants (amplification of the partial nptII fragment)	[17]
	aRestriction sites are shown in lower case letters, italicized and underlined.
