# Supplementary material
Source: Research Square preprint supplement (doi:10.21203/rs.3.rs-9893367/v1)
Supplement: Supplementary file 3 [file a8c72e730a59eff049822c18.xlsx]

## Sheet: Table S_Plasmids
			Supplemental Table 1. Plasmids used in this study
			Prasmid	Description		Source or reference
			pAg1	Streamlined version of the binary vector pBIN19 containing sequences necessary for replication in E. coli and Agrobacterium tumefaciens (oriV and trfA), E. coli neomycin phosphotransferase gene (nptII), and the transferable DNA (T-DNA) region, with a multiple cloning site within the T-DNA region		[16]
			pAg1-TinCYP51B/T	The 5'-UTR of TinCYP51B gene (2.52 kb) (GenBank accession no. OK539858), The nptII cassette [the promoter sequence of Aspergillus nidulans tryptophan C (trpC) gene (PtrpC) (GenBank accession no. X02390), nptII, the termination sequence of Aspergillus fumigatus cgrA gene (TcgrA) (GenBank accession no. EAL84894)], the 3'-UTR of TinCYP51B gene (2.51 kb)		[7]
			pAg1-Tin1623/T	The 5'-UTR of TCONS_00001623 gene (1.52 kb), The nptII cassette, the 3'-UTR of TCONS_00001623 gene (1.50 kb)		This study
